# Supplementary material for: Crushed Gold Shell Nanoparticles Labeled with Radioactive Iodine as a Theranostic Nanoplatform for Macrophage-Mediated Photothermal Therapy
Source: PubMed Central journal article supplement (PMC7770679; doi:10.1007/s40820-019-0266-0), 2019-05-03
Supplement: 40820_2019_266_MOESM1_ESM.pdf [file 40820_2019_266_MOESM1_ESM.pdf]

Supporting Information for

**Crushed Gold Shell Nanoparticles Labeled with Radioactive Iodine as a  
Theranostic NanoplatforM for Macrophage-Mediated Photothermal  
Therapy**

Sang Bong Lee<sup>1</sup>, Jae-Eon Lee<sup>2</sup>, Sung Jin Cho<sup>1,3</sup>, Jungwook Chin<sup>1</sup>, Sang Kyoon Kim<sup>7</sup>, In-Kyu Lee<sup>3,5</sup>, Sang-Woo Lee<sup>3,4</sup>, Jaetae Lee<sup>4,6</sup>, Yong Hyun Jeon<sup>3,7,\*</sup>

<sup>1</sup>New Drug Development Center, Daegu-Gyeongbuk Medical Innovation Foundation, Daegu, South Korea

<sup>2</sup>Department of Biomaterials Science, College of Natural Resources and Life Science/Life and Industry Convergence Research Institute, Pusan National University, Pusan, South Korea

<sup>3</sup>Leading-edge Research Center for Drug Discovery and Development for Diabetes and Metabolic Disease, Kyungpook National University Hospital, Daegu, 702-210, South Korea

<sup>4</sup>Department of Nuclear Medicine, Kyungpook National University Hospital, Daegu, 702-210, South Korea

<sup>5</sup>Department of Internal Medicine, Kyungpook National University School of Medicine, Daegu 700-721, South Korea

<sup>6</sup>Daegu-Gyeongbuk Medical Innovation Foundation, Daegu 360-4, South Korea

<sup>7</sup>Laboratory Animal Center, Daegu-Gyeongbuk Medical Innovation Foundation, Daegu 360-4, South Korea

Sang Bong Lee and Jae-Eon Lee contributed equally to this study.

\*Corresponding author. E-mail: jeon9014@gmail.com (Yong Hyun Jeon)

## Supplementary Figures

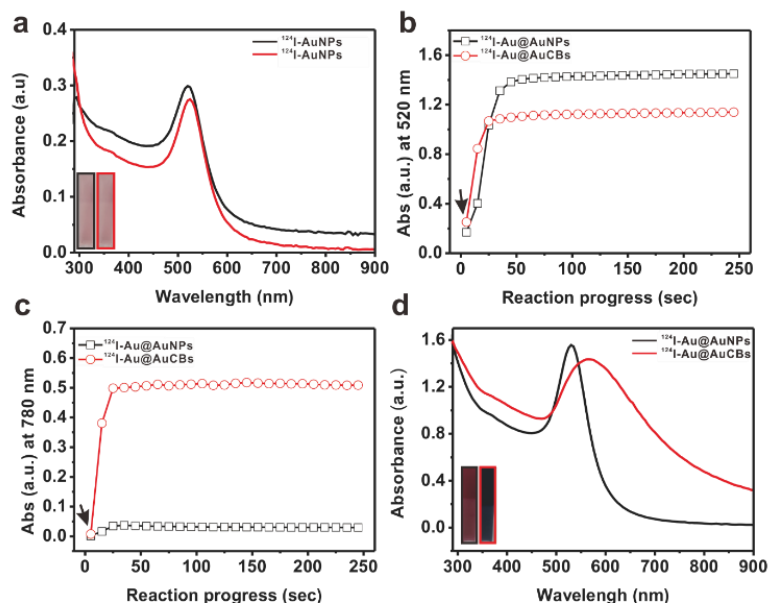

**Fig. S1** Characterization of  $^{124}\text{I-Au@AuNPs}$  and  $^{124}\text{I-Au@AuCBs}$ . **a** Normalized absorption spectrum of  $^{124}\text{I-AuNPs}$  before Au shell formation. **b, c** The reaction rate of Au-shell coverage on  $^{124}\text{I-Au@AuNPs}$  at 520 and 600 nm. **d** Normalized absorption spectra of  $^{124}\text{I-Au@AuNPs}$  and  $^{124}\text{I-Au@AuCBs}$

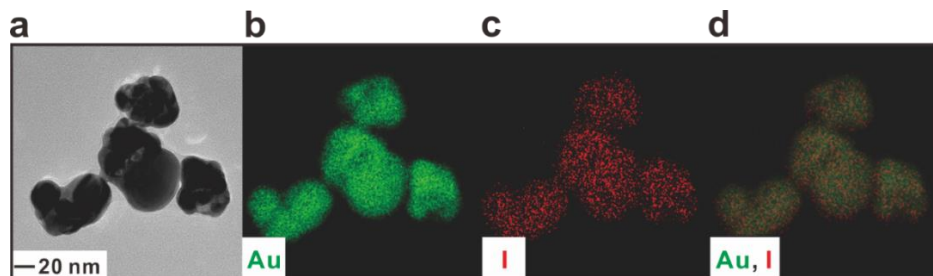

**Fig. S2** **a** TEM micrograph of  $^{124}\text{I-Au@AuCBs}$  and energy dispersive X-ray-based elemental mapping of **b** Au and **c** I. A merged image is also shown **d**.

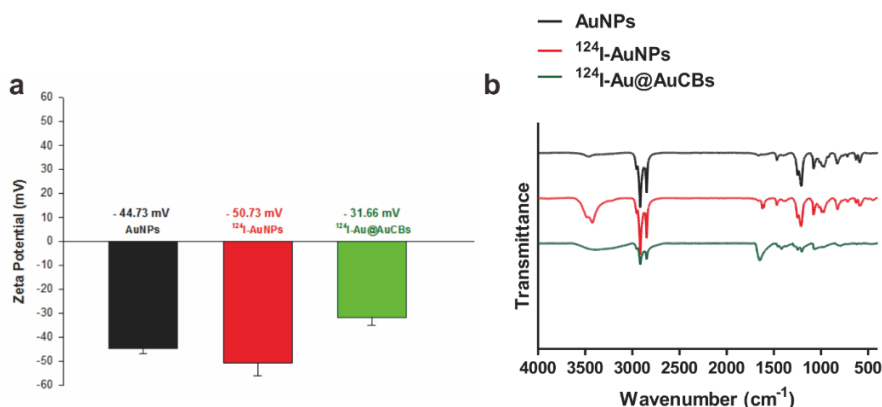

**Fig. S3** **a** Zeta-potentials, **b** FT-IR of AuNPs,  $^{124}\text{I-AuNPs}$ , and  $^{124}\text{I-Au@AuCBs}$

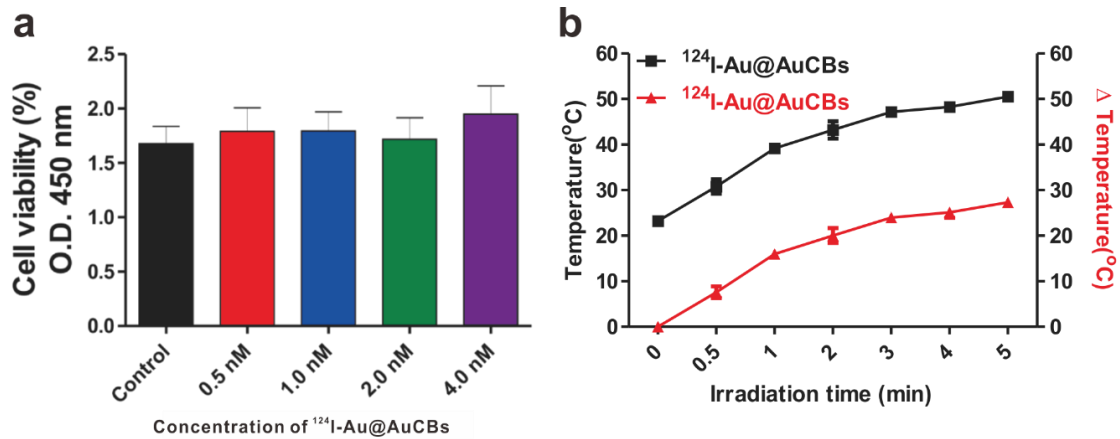

**Fig. S4 Toxicity of  $^{124}\text{I-Au@AuCBs}$  in colon cancer CT26/cells.** **a** Cells were seeded in 96-well plates and treated with  $^{124}\text{I-Au@AuCBs}$  for 24 h. Cell proliferation was analyzed using the Cell Counting Kit-8 (CCK-8) assay. **b** Curves showing changes in the temperature ( $\Delta$ ) of the  $^{124}\text{I-Au@AuCBs}$  upon irradiation of the colon cancer CT26 cells with an NIR laser for 5 min

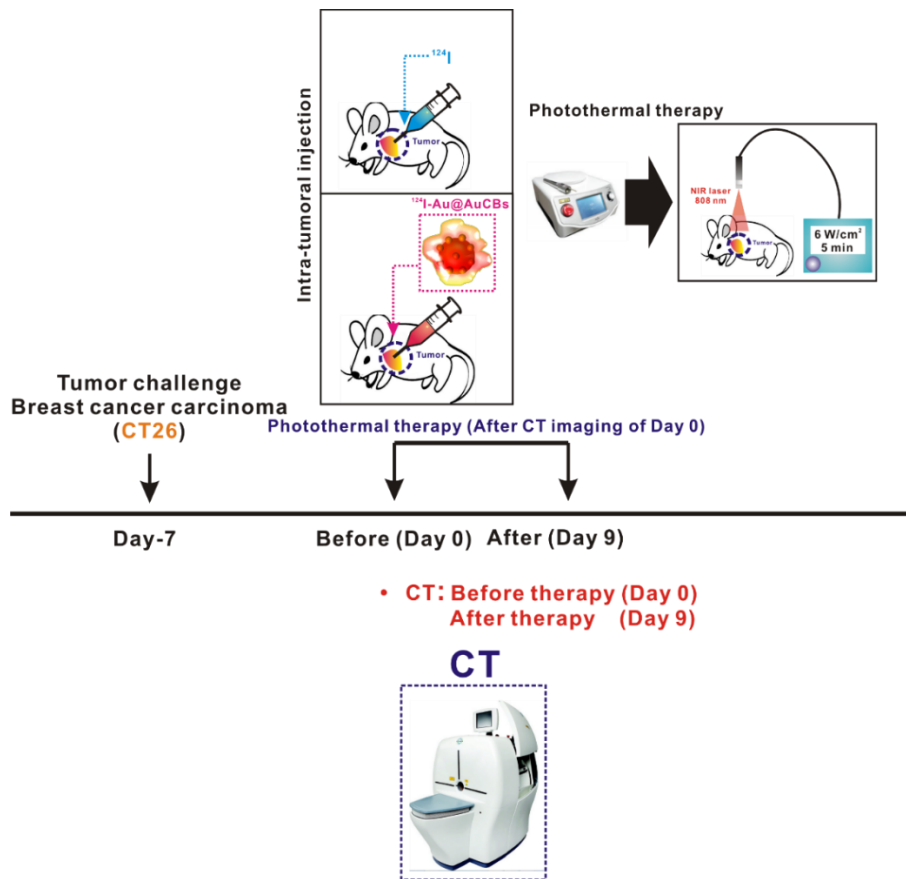

**Fig. S5 Schematic representations of the protocol for *in vivo* photothermal therapy using  $^{124}\text{I-Au@AuCBs}$  for CT26 tumor-bearing mice.** CT26 tumor-bearing mice received free  $^{124}\text{I}$  and  $^{124}\text{I-Au@AuCBs}$  via intratumoral injection. Before and after therapy, changes in tumor volume were monitored post-photothermal therapy via positron emission tomography/computed tomography at indicated time points. *In vivo* experiments were performed in duplicate (n=7 mice per group)
